# Supplementary material for: Spherically aggregated Cu2O–TA hybrid sub-microparticles with modulated size and improved chemical stability
Source: Royal Society of Chemistry journal article supplement (doi:10.1039/c7ce00127d), 2017-01-01
Supplement: c7ce00127d1.pdf [file c7ce00127d1.pdf]

## Supporting Information

### **Spherically Aggregated Cu<sub>2</sub>O-TA Hybrid Sub-microparticles with Modulated Size and Improved Chemical Stability**

Chao Cai,<sup>a,b</sup> Tang Zhu,<sup>a,b</sup> Dongdong Li,<sup>a</sup> Yun Ran,<sup>a,b</sup> Haixia Dong,<sup>a</sup> Ning Zhao<sup>a\*</sup> and Jian Xu<sup>a, b\*</sup>

<sup>a</sup> Beijing National Laboratory for Molecular Sciences, Laboratory of Polymer Physics and Chemistry, Institute of Chemistry, Chinese Academy of Sciences, Beijing 100190, P. R. China

<sup>b</sup> University of Chinese Academy of Sciences, Beijing 100049, P. R. China

\* E-mail: zhaoning@iccas.ac.cn

\* E-mail: jxu@iccas.ac.cn.

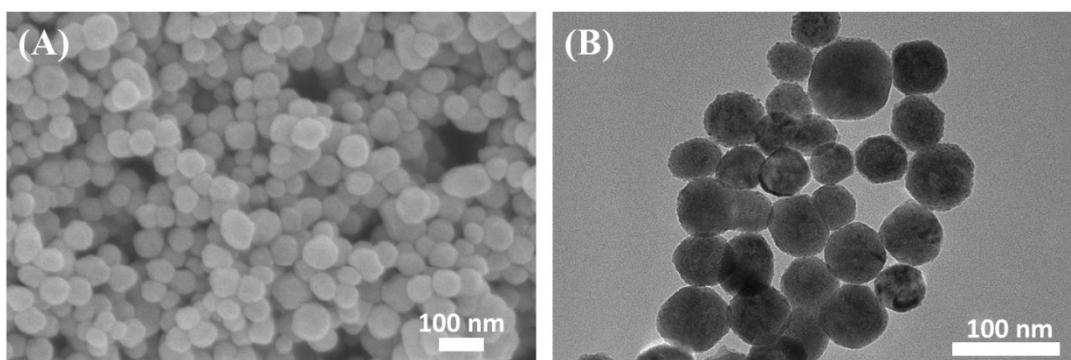

**Figure S1.** SEM (A) and TEM (B) images of Cu<sub>2</sub>O nanoparticles prepared without using TA.

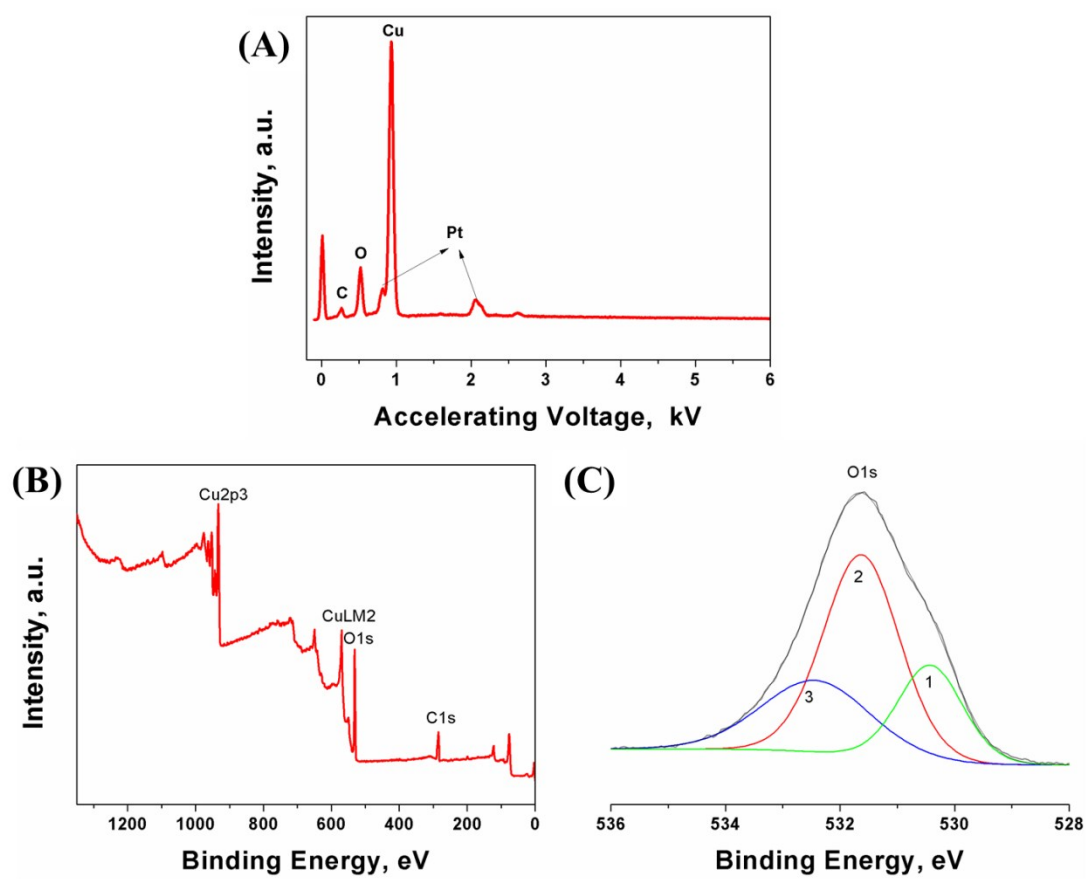

**Figure S2.** (A) EDS curve, (B) XPS survey and (C) high-resolution scanning of O1s for Cu<sub>2</sub>O-TA.

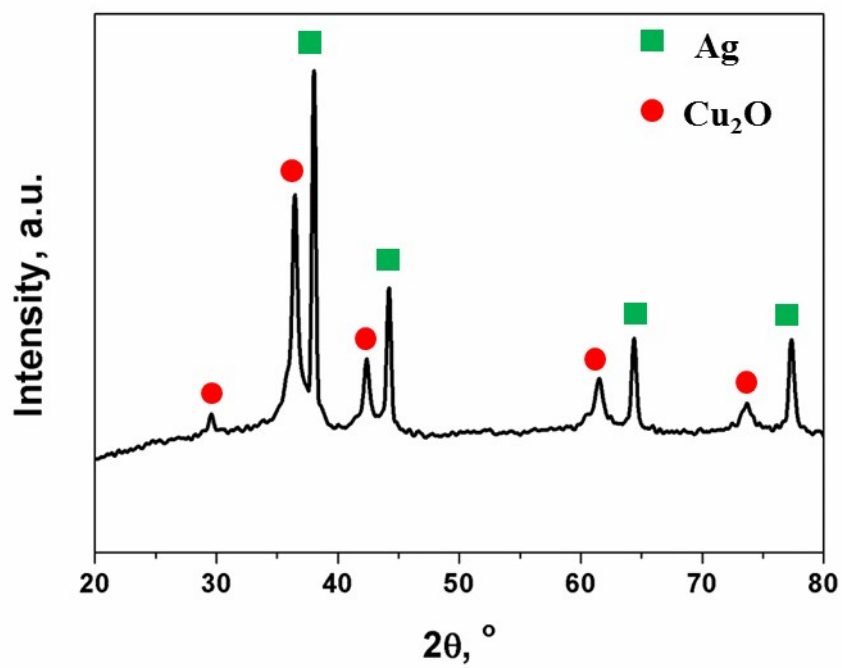

**Figure S3.** XRD patterns of the product after addition of AgNO<sub>3</sub> into the Cu<sub>2</sub>O-TA dispersion. The formation of Ag confirms the appearance of TA in Cu<sub>2</sub>O-TA.

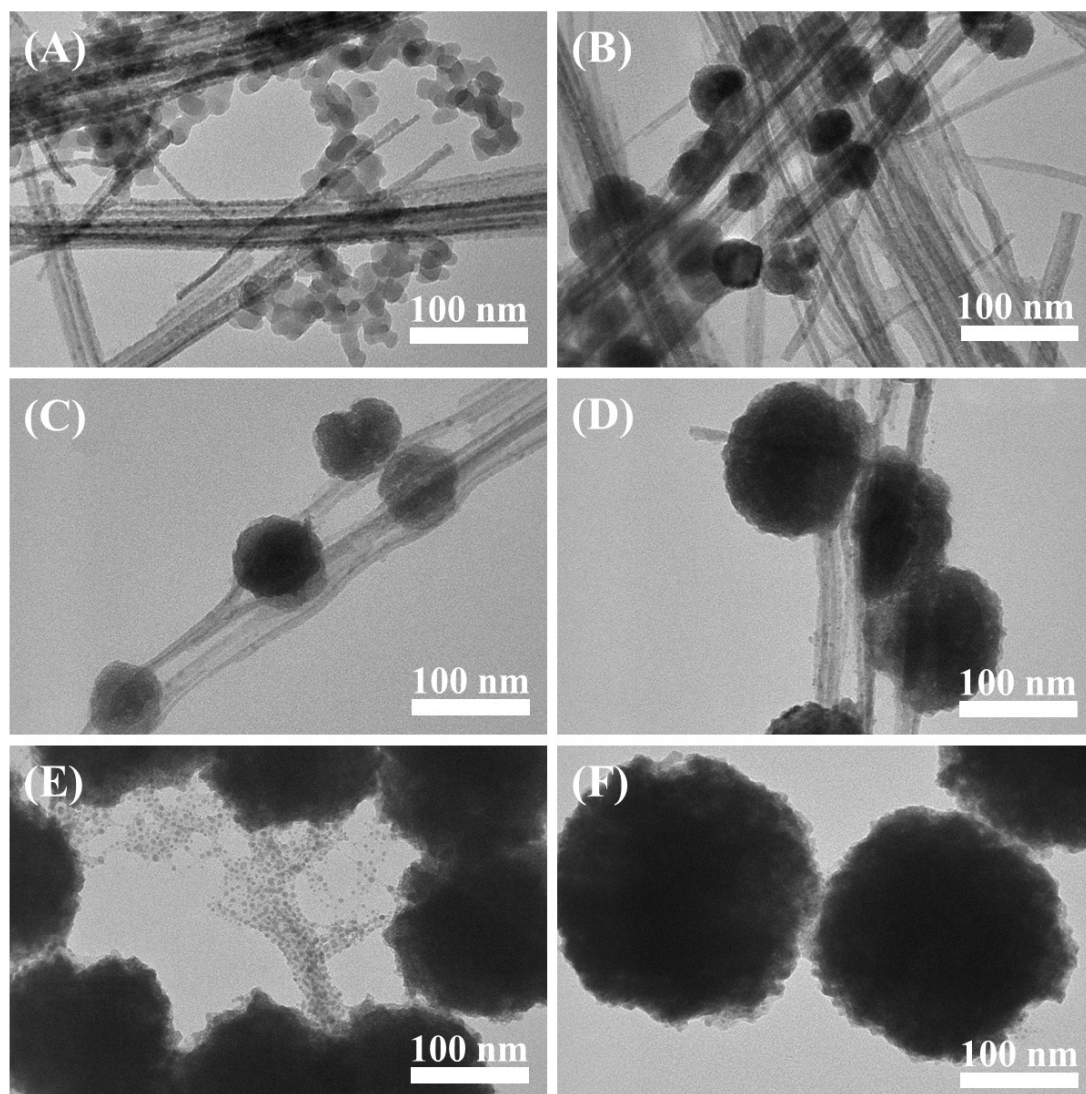

**Figure S4.** TEM images for the evolution of Cu<sub>2</sub>O-TA sub-microparticles. The extents of the reaction are 2% (A), 10% (B), 20% (C), 40% (D), 70% (E), 100% (F), respectively.

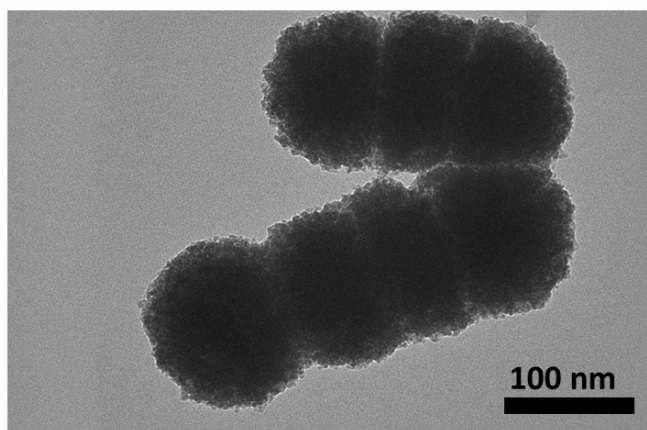

**Figure S5.** TEM image of rod-like particles in the final product.

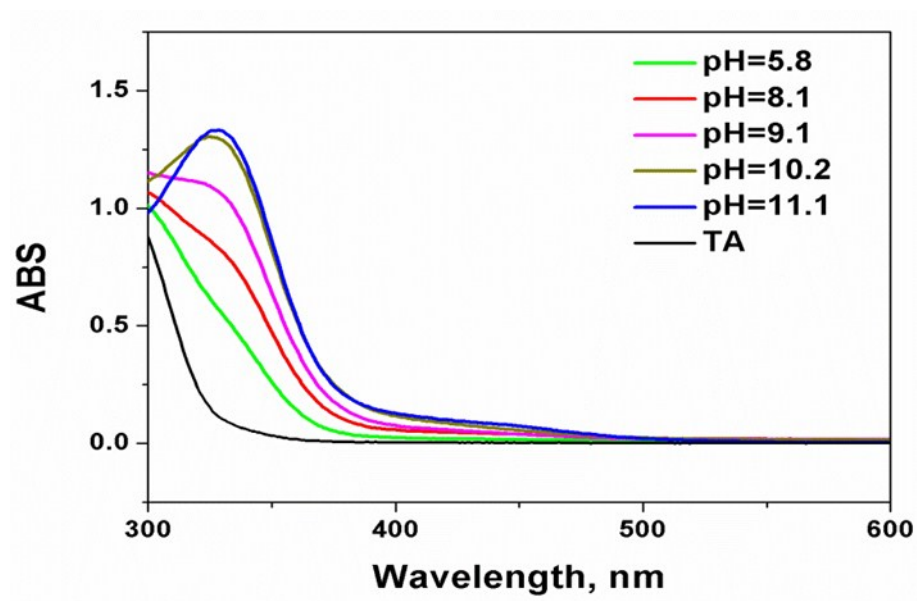

**Figure S6.** UV absorption of TA-Cu<sup>2+</sup> solutions with different pH values.

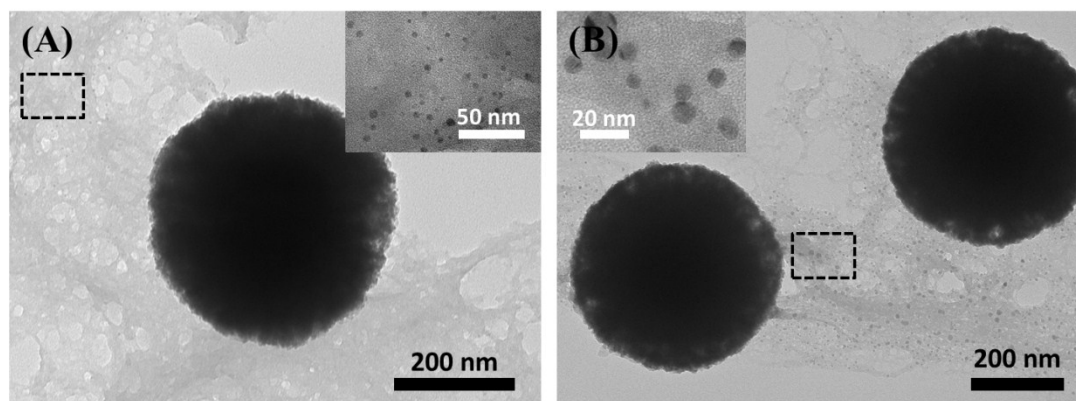

**Figure S7.** TEM images of  $\text{Cu}_2\text{O}$ -TA obtained when 5 mL (A) and 10 mL (B) TA added into the reaction system (1 mL TA was added in the typical synthesis formulation in the main text). The insets correspond to the magnified images of the marked zones, respectively.



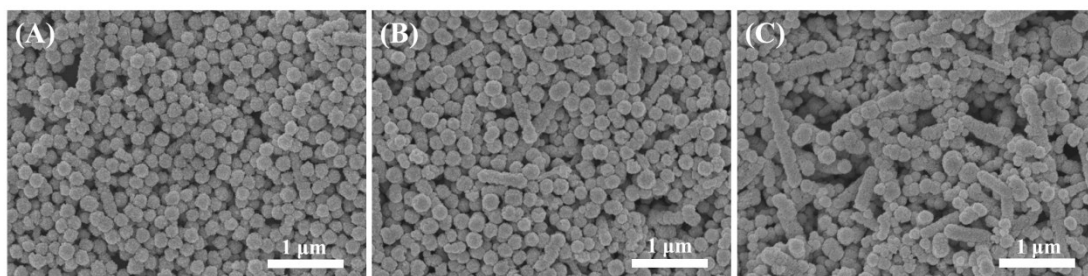

**Figure S8.** Morphology variations of  $\text{Cu}_2\text{O}$ -TA sub-microparticles with the change of the adding rates of AA solution into the  $\text{Cu}(\text{OH})_2$ -TA dispersions (A: 60 drops /min; B: 30 drops /min; C: added directly at the very first).

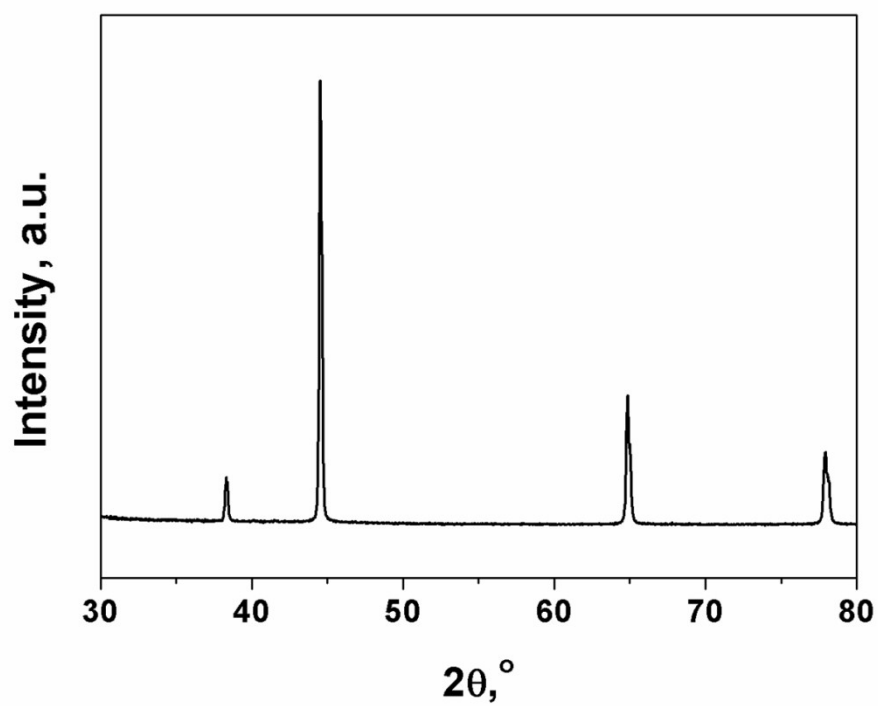

**Figure S9.** XRD pattern of bare Si wafer which was used as the support for the samples in oxidation test.

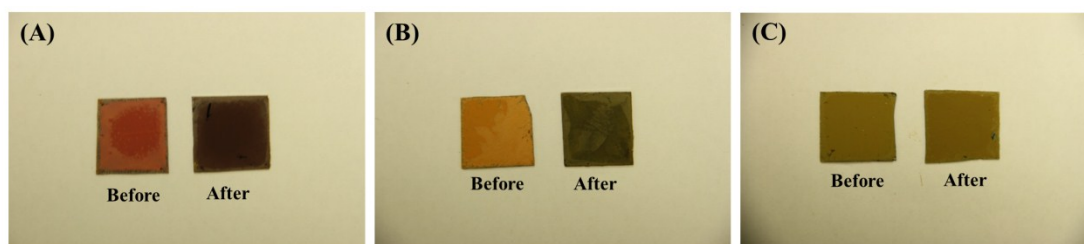

**Figure S10.** Photographs of the coatings on Si wafers before and after the oxidation test. (A: m-Cu<sub>2</sub>O; B: n-Cu<sub>2</sub>O; C: Cu<sub>2</sub>O-TA)
